# Supplementary material
Source: HighWire-hosted journal article supplement (https://www.cfp.ca/highwire/filestream/30356/field_highwire_adjunct_files/1/Educational_consultation_note.pdf)
Supplement: Educational_consultation_note.pdf [file Educational_consultation_note.pdf]

## Educational consultation note

Learner : \_\_\_\_\_ Training level : \_\_\_\_\_

Teacher : \_\_\_\_\_ Date : \_\_\_\_\_

### Chief complaint(s)

(as identified by the learner, teachers or staff; see list in Table 1)

### Data gathering

#### Identification/Personal situation

(problems that might impact on training)

Personal :

Familial :

Financial :

Social :

Cultural :

Professional

(motivation, career plans, etc.):

Missing data :

#### Past educational history

(feedback on previous rotations  
If available)

Missing data :

#### Habits

(learning strategies, lifestyle)

Missing data :

### History of the present difficulties

Validate chief complaints with the learner

Elicit characteristics of the difficulties

- **What** – What kind of difficulties is experienced?  
What tends to improve the situation or get it worse?
- **When** – When did the difficulties start, and what was the evolution over time?
- **Where** – Where do the difficulties happen?  
(Setting/courses/rotations)
- **Why** – Why do these difficulties occur? (Onset)
- **How much** – How severe are the difficulties?

Adopt a learner-centered approach

- **Causes** identified by the learner
- **Worries** brought by academic difficulties
- Current or expected **impact** of the problem
- **Expectations** of the learner in dealing with the problematic situation

Missing data :

### Review of the educational systems

| Environment                                                                                                                                   | Teacher                                                                                                                                                                         | Learner                                                                                                                                                                                                                                                                                |
|-----------------------------------------------------------------------------------------------------------------------------------------------|---------------------------------------------------------------------------------------------------------------------------------------------------------------------------------|----------------------------------------------------------------------------------------------------------------------------------------------------------------------------------------------------------------------------------------------------------------------------------------|
| <input type="checkbox"/> Academic setting<br><input type="checkbox"/> Conditions for learning<br><input type="checkbox"/> Patient care issues | <input type="checkbox"/> Enthusiasm<br><input type="checkbox"/> Interpersonal skills<br><input type="checkbox"/> Organisation/clarity<br><input type="checkbox"/> Role modeling | <input type="checkbox"/> Medical expert<br><input type="checkbox"/> Communicator<br><input type="checkbox"/> Collaborator<br><input type="checkbox"/> Manager<br><input type="checkbox"/> Health advocate<br><input type="checkbox"/> Scholar<br><input type="checkbox"/> Professional |
| Missing data :                                                                                                                                | Missing data :                                                                                                                                                                  | Missing data :                                                                                                                                                                                                                                                                         |

| Objective exam                                                                                                       | Competency that is assessed<br>(Many types of objective exams are suggested for each competency) |              |              |                 |         |         |              |
|----------------------------------------------------------------------------------------------------------------------|--------------------------------------------------------------------------------------------------|--------------|--------------|-----------------|---------|---------|--------------|
|                                                                                                                      | Family Medicine Expert                                                                           | Communicator | Collaborator | Health advocate | Scholar | Manager | Professional |
| <b>Clinical activities</b>                                                                                           |                                                                                                  |              |              |                 |         |         |              |
| Indirect supervision                                                                                                 |                                                                                                  |              |              |                 |         |         |              |
| Direct observation (or videotaped interview)                                                                         |                                                                                                  |              |              |                 |         |         |              |
| Chart review                                                                                                         |                                                                                                  |              |              |                 |         |         |              |
| Comments from staff or patients                                                                                      |                                                                                                  |              |              |                 |         |         |              |
| Theoric exam                                                                                                         |                                                                                                  |              |              |                 |         |         |              |
| Objective structured clinical exam (OSCE) or Simulated medical interview                                             |                                                                                                  |              |              |                 |         |         |              |
| Oral exam                                                                                                            |                                                                                                  |              |              |                 |         |         |              |
| Critical incident                                                                                                    |                                                                                                  |              |              |                 |         |         |              |
| <b>Other activities</b>                                                                                              |                                                                                                  |              |              |                 |         |         |              |
| Teaching<br>(observation of the resident doing a lecture, teaching a small group of students or one-to-one teaching) |                                                                                                  |              |              |                 |         |         |              |
| Research<br>(evaluation of planification/realization/presentation of the resident's research project)                |                                                                                                  |              |              |                 |         |         |              |
| Management<br>(analysis of the resident's participation to committees, service meetings, etc.)                       |                                                                                                  |              |              |                 |         |         |              |
| <b>Assessment</b>                                                                                                    |                                                                                                  |              |              |                 |         |         |              |
| I Knowledge and skills                                                                                               |                                                                                                  |              |              |                 |         |         |              |
| II Attitude                                                                                                          |                                                                                                  |              |              |                 |         |         |              |
| III Learner's personal problems                                                                                      |                                                                                                  |              |              |                 |         |         |              |
| IV External stressors (system/teacher)                                                                               |                                                                                                  |              |              |                 |         |         |              |
| V Global assessment of functioning and prognosis                                                                     |                                                                                                  |              |              |                 |         |         |              |
| <b>Plan</b>                                                                                                          |                                                                                                  |              |              |                 |         |         |              |
| 1. Resolution of any underlying cause (axes III and IV)                                                              |                                                                                                  |              |              |                 |         |         |              |
| 2. Identification of learning needs and measurable educational objectives with the learner                           |                                                                                                  |              |              |                 |         |         |              |
| 3. Implementation of educational strategies and resources over a reasonable timeline                                 |                                                                                                  |              |              |                 |         |         |              |
| 4. Monitoring of the educational intervention through regular feedback and evaluation                                |                                                                                                  |              |              |                 |         |         |              |
| Signatures : _____ resident _____ supervisor/preceptor                                                               |                                                                                                  |              |              |                 |         |         |              |
